# Supplementary material for: Antibodies against Serum Anti-Melanoma Differentiation-Associated Gene 5 in Rheumatoid Arthritis Patients with Chronic Lung Diseases
Source: MDPI journal article supplement (doi:10.3390/medicina59020363), 2023-02-14
Supplement: s1 [file s1]

# Supplementary Materials: Antibodies against Serum Anti-Melanoma Differentiation-Associated Gene 5 in Rheumatoid Arthritis Patients with Chronic Lung Diseases

Supplementary Table S1. The positivity of RF, ACPA, and anti-MDA5 Ab in the RA patients.

|                              | ILD        |          | UIP       |          | NSIP      |          | AD         |          | Emphysema |          | CLD(+)     |          | CLD(–)     |
|------------------------------|------------|----------|-----------|----------|-----------|----------|------------|----------|-----------|----------|------------|----------|------------|
|                              |            | <i>P</i> |           | <i>P</i> |           | <i>P</i> |            | <i>P</i> |           | <i>P</i> |            | <i>P</i> |            |
| Anti-MDA5 Ab positive, n (%) | 12 (8.7)   | 0.1056   | 6 (9.5)   | 0.1147   | 6 (8.0)   | 0.2272   | 12 (7.2)   | 0.2578   | 2 (5.1)   | 0.6788   | 26 (7.6)   | 0.1502   | 9 (4.2)    |
| RF positive, n (%)           | 126 (91.3) | 0.0532   | 57 (90.5) | 0.2276   | 69 (92.0) | 0.0851   | 146 (88.0) | 0.3035   | 34 (87.2) | 0.8111   | 306 (89.2) | 0.0692   | 180 (83.7) |
| ACPA positive, n (%)         | 127 (92.0) | 0.8406   | 59 (93.7) | 1.0000   | 68 (90.7) | 0.6223   | 147 (88.6) | 0.2115   | 36 (92.3) | 1.0000   | 310 (90.4) | 0.4433   | 199 (92.6) |

RA: rheumatoid arthritis, ILD: interstitial lung disease, UIP: usual interstitial pneumonia, NSIP: nonspecific interstitial pneumonia, AD: airway disease, CLD: chronic lung disease, RF: rheumatoid factor, ACPA: anti-citrullinated peptide antibody, MDA5: melanoma differentiation-associated gene 5. ILD group includes UIP and NSIP groups. CLD(+) group includes UIP, NSIP, AD, and emphysema groups. Number of each group is shown. Percentages are shown in parenthesis. Difference was tested in the comparison with the CLD(–) population by Fisher's exact test using  $2 \times 2$  contingency tables.

Supplementary Table S2. The comparison of anti-MDA5 Ab in the RA patients and controls.

|              | ILD                   | UIP                   | NSIP     | AD                    | Emphysema             | CLD(+)                | CLD(–)   | RA                    | Controls  |
|--------------|-----------------------|-----------------------|----------|-----------------------|-----------------------|-----------------------|----------|-----------------------|-----------|
|              | <i>P</i>              | <i>P</i>              | <i>P</i> | <i>P</i>              | <i>P</i>              | <i>P</i>              | <i>P</i> | <i>P</i>              |           |
| Anti-MDA5 Ab | $6.31 \times 10^{-5}$ | $7.33 \times 10^{-5}$ | 0.0015   | $2.70 \times 10^{-9}$ | $8.42 \times 10^{-7}$ | $1.70 \times 10^{-8}$ | 0.0002   | $3.26 \times 10^{-7}$ | 2.9 (2.2) |

RA: rheumatoid arthritis, ILD: interstitial lung disease, UIP: usual interstitial pneumonia, NSIP: nonspecific interstitial pneumonia, CLD: chronic lung disease, MDA5: melanoma differentiation-associated gene 5. ILD group includes UIP and NSIP groups. CLD(+) group includes UIP, NSIP, AD, and emphysema groups. Number of controls is shown.

Percentages are shown in parenthesis. Difference was tested in the comparison with the control population by Mann–Whitney U test.

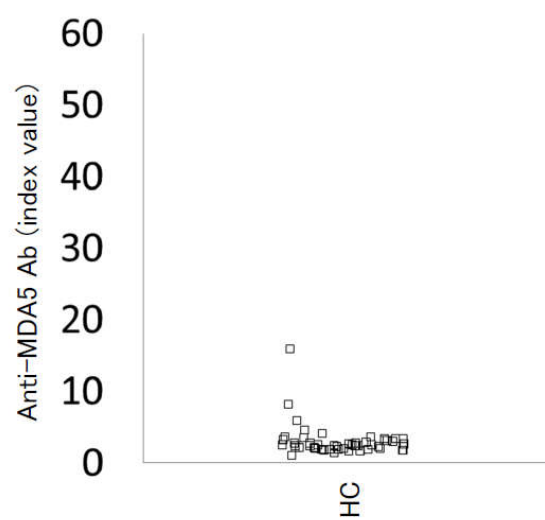

**Supplementary Figure S1.** Distribution of anti-MDA5 Abs in 52 healthy controls. HC: healthy controls, MDA5: melanoma differentiation-associated gene 5, Ab: antibody.
